# Supplementary material
Source: PubMed Central journal article supplement (PMC3910830)
Supplement: AAC.01353-13_zac002142546so1.pdf [file AAC.01353-13_zac002142546so1.pdf]

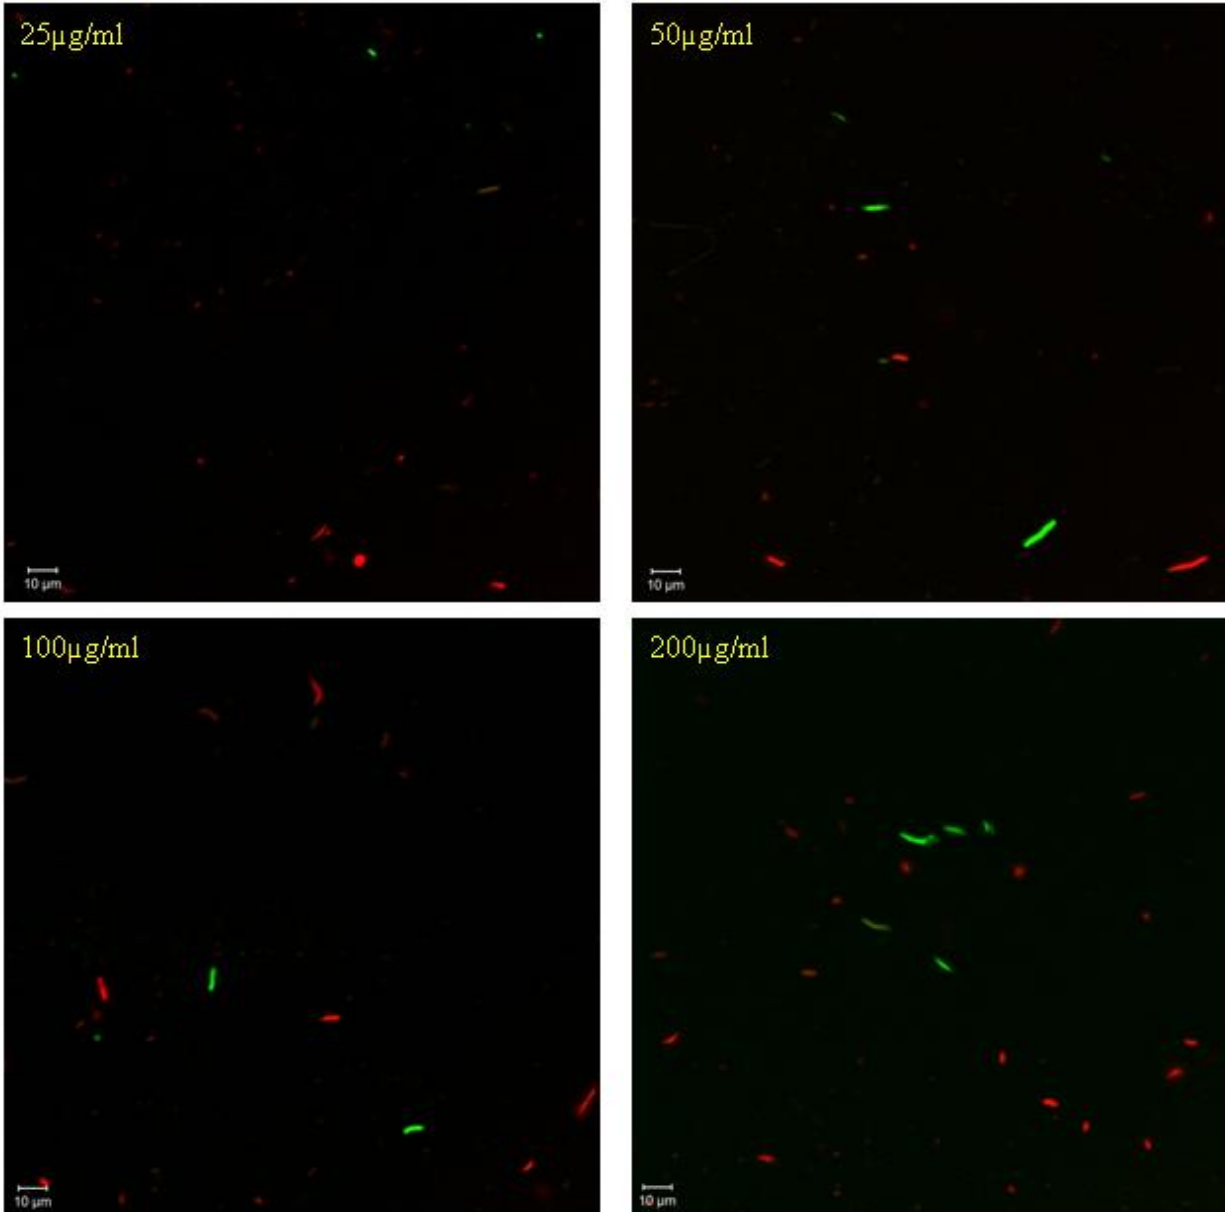

Fig. S1. Activity of imipenem ( $\geq 25\mu\text{g/ml}$ ) against overnight *K. pneumoniae* BAMC 07-18 biofilms grown in the Bioflux system. Biofilms were treated with different concentrations of imipenem for five hours, stained with Live (green)/Dead (red) BacLight, and observed by confocal microscopy. Only a few individual live cells remained after the 5-hour treatment.

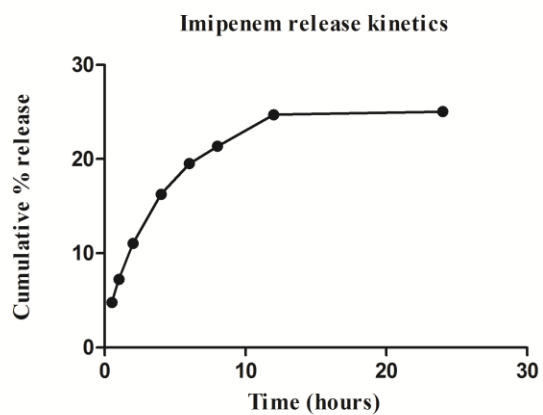

Fig. S2. Release kinetics of imipenem from Intracite gel. The release kinetics was determined by the use of a six-station Franz diffusion cell. Release samples of 0.2 mL were removed at different time points (0.5, 1, 2, 4, 6, 8, 12 and 24 hours) and the level of released imipenem was determined by HPLC and confirmed by activity assay. The released imipenem percentage plateaued after approximately 12 hours at about 25% of total imipenem incorporated into the gel.
